# Supplementary material for: Reproductive Function in a Population of Young Faroese Men with Elevated Exposure to Polychlorinated Biphenyls (PCBs) and Perfluorinated Alkylate Substances (PFAS)
Source: PubMed Central journal article supplement (PMC6165232; doi:10.3390/ijerph15091880), 2018-08-30
Supplement: ijerph-15-01880-s001.pdf [file ijerph-15-01880-s001.pdf]

**Supplementary table 1.** Serum concentrations ( $\mu\text{g/g}$  lipid) of polychlorinated biphenyls (PCBs), persistent organic pollutants (POPs) and perfluorinated alkylate substances (PFAS). Results shown as medians and range.

| Exposure           | All men<br>(=263) |        |             |
|--------------------|-------------------|--------|-------------|
|                    | % >LOD            | Median | Range       |
| PCB28              | 92                | 0.01   | 0.002-0.02  |
| PCB52              | 66                | 0.007  | 0.001-0.01  |
| PCB101             | 54                | 0.007  | 0.0007-0.02 |
| PCB118             | 91                | 0.04   | 0.002-0.15  |
| PCB153             | 100               | 0.230  | 0.02-0.67   |
| PCB105             | 77                | 0.009  | 0.001-0.02  |
| PCB156             | 75                | 0.008  | 0.001-0.02  |
| PCB180             | 99                | 0.16   | 0.009-0.50  |
| PCB138             | 99                | 0.19   | 0.01-0.53   |
| $\Sigma\text{PCB}$ | 100               | 1.17   | 0.1-3.4     |
| PFOA               | 100               | 2.77   | 0.93-20.43  |
| PFHxS              | 100               | 0.81   | 0.18-2.46   |
| PFNA               | 100               | 1.49   | 0.61-18.10  |
| PFDA               | 100               | 0.52   | 0.16-4.59   |
| brPFOS             | 100               | 7.36   | 0.86-27.73  |
| nPFOS              | 100               | 12.16  | 3.48-45.12  |
| PFOS               | 100               | 19.52  | 4.34-72.85  |

Abbreviation: LOD= limit of detection; CI= confidence interval;  $\Sigma\text{PCB}=(\text{PCB } 138 + \text{PCB } 153 + \text{PCB } 180)*2$ ; PCB= polychlorinated biphenyls; HCB=hexachlorobenzene; betaHCH=beta hexachlorocyclohexane; pp-DDE=p,p'-Dichlorodiphenyldichloroethylene; PFOS=perfluorooctane sulfonic acid; PFOA=perfluorooctanoic acid; PFHxS=perfluorohexanesulfonic acid, PFNA=perfluorononanoic acid and PFDA =perfluorodecanoic acid).
